# Supplementary material for: Towards A Comprehensive Model of Placemaking Strategy Assessment of Livability in Commercial Streets Via Placemaking
Source: Preprints.org preprint supplement (doi:10.20944/preprints202303.0408.v1), 2023-03-23
Supplement: Supplementary file 2 [file supplementary]

## Sheet: checklist 
				Excellent=3	Fair=2	very poor=1
			No.
							Eskan
	Factors			Sub-Factors	possible value
	Density		1	pedesterian and vehical flow and density	High	Excellent	3
					moderate	Fair
					Low	Very Poor
			2	time functions activation	both times are activated	Excellent
					at night more than day	Fair
					specific time at ady	Very Poor	1
	Diversity		3	people metting	avilable alonge street spaces	Excellent	3
					avilable in different locations	Fair
					not avilable, or very weak	Very Poor
			4	concentration of activities	along the frontage side	Excellent
					segmented but still enhancing passing	Fair	2
					segmented and doesn’t enhance passing by	Very Poor
			5	functions in Street	Suitable for all ages and diversable	Excellent
					Suitable for men only,	Fair	2
					Not suitable for children, and limited diversity	Very Poor
			6	amenities and entertainment avilability	along the street scape	Excellent
					few parts of the street (gardens)	Fair	2
					not avilable	Very Poor
			7	Restaurants and café avilability	most are cafes and resturants	Excellent	3
					in parts of the street (some only)	Fair
					café or restaurants are very rare	Very Poor
			8	different shops types	diversable functions (huge divesirty)	Excellent
					Moderate Diversity	Fair	2
					limited functions diversity	Very Poor
	Fnctionality		9	street generates a sense of safety	yes	Excellent	3
					somehow	Fair
					no	Very Poor
			10	street suitability for shopping	convenient, identified as Crowded street	Excellent	3
					average crowding	Fair
					inconvenient, Bare street	Very Poor
			11	street functions and gathering spaces	avilable with local gatheeing places	Excellent	3
					monotonous not diversable	Fair
					functions with no gathering places	Very Poor
			12	function facilitate communication and interaction	avilable at most parts of the street	Excellent	3
					few	Fair
					not avilable	Very Poor
	Visibility		1	commercial street accessibility within the city	Clear and accessible	Excellent
					Clear access, but crowded	Fair	2
					Complicated access	Very Poor
			2	Formal Crossing Points	Avilable and clear for Pedesterian	Excellent
					avilable but no indicator for it nor maintained	Fair	2
					No avilable crossing points	Very Poor
			3	sidewalks relation	connected along the street	Excellent
					seperated to segments but still connected visually	Fair	2
					not connected and segmented	Very Poor
			4	Façade Tranceparency (in & out Connection)	Excllent Connection and Clear	Excellent
					Some parts only are Connected	Fair	2
					weak connection	Very Poor
			5	street visibility	visible, clear gives a whole approach	Excellent	3
					visible with some obstcles	Fair
					weak visibility	Very Poor
	Furniture Avilability & Maintenance		6	street furniture such as (seating, rubbish bins, …)	avilable and in a good condition	Excellent	3
					very limited or not functioning well	Fair
					not avilable	Very Poor
			7	Street and sidewalks maintenance and street, as well cleanness	well maintained and clean	Excellent
					weak maintaied but clean	Fair	2
					not maintained nor clean	Very Poor
			8	Majority of shop lights, and Street lighting	Compatible with building and street, both are avilable	Excellent	3
					Only shops lighting are active	Fair
					No integration with street lighting, nor avilable	Very Poor
			9	Movable shops and vendors	attached to shops elevation	Excellent
					detached added to the façade	Fair	2
					rare or not avilable	Very Poor
	Satisfaction		10	Street edges within sidewalks	definite and clear	Excellent	3
					Some parts of the street have certain edges	Fair
					Blurred and undefined edges	Very Poor
			11	Green Avilability	more than (50%) from the street and Sidewalks area	Excellent
					(25%-50%) from the street area	Fair
					(2%-25%) not avilable or very limited	Very Poor	1
			12	Crossing between	clear and avilable	Excellent
					avilable but not clear with no signs	Fair	2
					not avilable	Very Poor
	Economic Satisfaction		1	Time Users Expend	One Hour	Excellent
					Two Hours	Fair	2
					Less than Half an hour	Very Poor
			2	Local Retails	Avilable Along Street	Excellent	3
					Some of Retails with Local Shops	Fair
					No local Shops are Avilable	Very Poor
	Adaptability		3	informal shopping for more people attraction	avilabel in different parts of the street	Excellent	3
					mixed with other activities	Fair
					not avilable	Very Poor
			4	mixture of formal and informal shopping	both are avilable	Excellent	3
					only formal	Fair
					informal only	Very Poor
			5	Moveable shops and vendors	avilabel	Excellent
					in few shops only	Fair	2
					not avilable	Very Poor
	Human Scale		1	Building Scale	compatible with human Scale	Excellent	3
					in some parts of the street only	Fair
					not compatible with human scale	Very Poor
			2	Street proportion, ( width to buildings height)	1:1 relation	Excellent
					Width >Height	Fair	2
					Width <Height	Very Poor
			3	Rows of Trees	Avilable along the street scape and the middle part	Excellent
					in the middle part only	Fair
					very rare or No Rows of Trees	Very Poor	1
	Edge Compatability		4	Number of Entrances at each Segmnets for each (100)m or each segments	5-10 entrances	Excellent
					4-2 etnrances	Fair	2
					<2 entrances	Very Poor
			5	Buidling As a façade	Forms one Connected Surface	Excellent	3
					Connected with Different Heights	Fair
					Segmented not Connected	Very Poor
	Morphological, (Building Direction, Building length,		6	shops entrances direction to sidewalks	direct connection to sidewalk	Excellent
					through corridor	Fair	2
					few steps in front mostly	Very Poor
			7	building Height	>= 2 stories	Excellent	3
					4-6 Stories	Fair
					more than 7	Very Poor
			8	buildings direction with the street	parallel with the street	Excellent	3
					perpendicular	Fair
					digonal	Very Poor
	Inclusiveness		9	places is useable and accessible	easy accessed and useable	Excellent	3
					modeart accessibility and useability	Fair
					difficult to access nor use	Very Poor
			10	Activites That happened, (sitting, gathering, standing & talking)	Various and enjoyable	Excellent	3
					in some parts of the street only	Fair
					very limited or not avilable	Very Poor
			11	Safe and Scure Environment	esay to walk and move	Excellent	3
					some cars passes on sidewalk, not too much safe	Fair
					many cars passes on sidewlaks	Very Poor
			12	Temprory Elements added to Permenet Buildling	Avilable in Restaurants and Cafes and other shops (mostly)	Excellent	3
					in some clothing shops and markets	Fair
					no added elements or very limited	Very Poor
	Connectivity		1	Street connection With Building	directlty connected (no barriers) with wide spaces	Excellent
					Barriers avilable (trees and furniture)	Fair	2
					weak connection, or very limited space	Very Poor
			2	building connection with sidewalks	connected through Frontage zone	Excellent	3
					connected through the pedesterian zone	Fair
					connected through the furnishing zone	Very Poor
			3	parts of the street	Seen with no Obstucles or limited	Excellent	3
					Various obstacles blocking the view	Fair
					obstacles, and building shape has negative impact on pedestrian	Very Poor
			4	building linking together	Continuously connected	Excellent	3
					partial bonding	Fair
					separated or segmented	Very Poor
	Unity		5	Height Unity	Same Building Height (almost)	Excellent	3
					Different Heights,	Fair
					some buildings extend the limite diversity	Very Poor
			6	Materials and Colors	Same for all Building	Excellent	3
					groups have the same materials	Fair
					Different Materilas and colors	Very Poor
			7	Building Elemnts	Aligned to main axis	Excellent	3
					Differenta alignemnet axises	Fair
					No definate Alignmnet	Very Poor
	Physical Characterstics		8	The presence of special needs equipments in street	avilable within street design	Excellent
					avilable but not standarized	Fair
					not avilable	Very Poor	1
			9	Number of street lanes	only one	Excellent	3
					twol lanes	Fair
					more than two	Very Poor
			10	sidewalks width compatible for walking	>=5 metres, or accomadate 4 persons and more	Excellent
					2-4 meter, or accomadtes 2-4 persons	Fair	2
					<2 meter, or less than 2 persons	Very Poor
			11	Sidewalks contains the three design parts, (Furnishing zone, Pedestrian zone, and Frontage Zone)	contains all the three main zones	Excellent	3
					cotains both Furnishing and Pedestrian zone or frontage with pedesterian only	Fair
					sidewalk in some parts of the street disappeared	Very Poor
	Enclosure		12	Height & Width Relation (between Street Width and Building Height)	vertical elements is proportionately related to the width (somehow compatible)	Excellent	3
					Height of some buildings not compatabil with the most heights	Fair
					Width more than Height	Very Poor
			13	Building Elevation	connected & contious	Excellent
					segmented to short groups	Fair	2
					Segmented with dead spaces	Very Poor
	Architectural Style		1	Buildings architectural features	most owns architectural features	Excellent
					some only	Fair
					No Architectural Feature	Very Poor	1
			2	Shops Arch. Theme	function and Arch. Theme matches	Excellent
					Function and Arch. Appreocah appears in some shops	Fair
					No Matching Theme	Very Poor	1
	Urban Context		3	Buildings Integration with urban context	Connects to physical surroundings	Excellent	3
					Some Parts only	Fair
					Contrasted	Very Poor
			4	Street patterns	Acommodate Both	Excellent
					Accommodates Pedesterian Movemet more	Fair	2
					Accommodates Cars movement more than Pedesterian Movemet	Very Poor
			5	Building Form	reflects the function	Excellent
					reflects Different Function	Fair
					No Reflection	Very Poor	1
			6	network of routes and spaces	Clear Connected No Dead Spaces	Excellent	3
					fragmented without dead spaces	Fair
					Segmented with Dead Spaces	Very Poor
			7	Building Respond to Site	Positivelly responds to orientation and walking pedesterian, (The emergence and receding of building blocks) with shading	Excellent	3
					moderate response	Fair
					weak response to site	Very Poor
	Legability		8	Design inclusiveness of street buildings	active, safe and accommodates different cultural background, affordable	Excellent	3
					moderate	Fair
					very low	Very Poor
			9	Buiding Height	almost same height	Excellent	3
					Few differences	Fair
					Big differences in height	Very Poor
			10	Clear Approcah	Buildings Appear As one contious Mass	Excellent	3
					Buildings are Fragmented, Still Connected Visually	Fair
					Fragmented no connection	Very Poor
	Proximity & Transitivity		1	Car movement and Parking accessiblity	accessible and Connected	Excellent	3
					accessible but far	Fair
					not accessible, (no avliable parking)	Very Poor
			2	Affordability of transport options	Private Cars and Public Transportation	Excellent	3
					Private Cars with limited public	Fair
					Private Cars only	Very Poor
			3	Moving From Parking Lots to Sidewalk Place	Easy Directly on street Edges and parking lots	Excellent
					On Parking Lots only, clear and Close	Fair	2
					Faraway or not Avilable	Very Poor
			4	Transition between Two sides	avilable, clear and well designed	Excellent
					avilable but not clear	Fair
					not avilable	Very Poor	1
			5	Transition Between Sidewalks segments	Walking easy and connected	Excellent	3
					connected with some obstucles	Fair
					very bad connection and not easy to transite	Very Poor
			6	cyclists and people with mobility handicap spaces	Avilable, well maintaiend	Excellent
					Avilable not Functioning Well	Fair
					not avilable	Very Poor	1
			7	Movement Separation Between Vehicles and Pedesterian	Seprated by Different Levels and rows of trees and different pavement materials	Excellent
					Different levels only	Fair	2
					Weak Separation	Very Poor
	Clarity		8	Access to Shops, Accessible to eat and sit spaces	Readable & Connected,Correspond people Need	Excellent	3
					Accessed With some Obstacles	Fair
					not clear nor visible, (limited)	Very Poor
			9	Movement Between Shops	Easy to Read by Pedestrians	Excellent	3
					Obstucles in Movemnets Way	Fair
					Not Easy to Recognise	Very Poor
			10	identified access to formal shopping	obvious and clear	Excellent
					obvious with some obstucles	Fair
					very weak access	Very Poor	1
	Movemnent Patterns		1	Street Activities	Diversable Attract People to move	Excellent	3
					Diversable, but sidewalk doesn’t Encourge Walking	Fair
					Not Diversable nor Easy to Walk	Very Poor
			2	pedestrian movement	Constant movement along the street	Excellent	3
					Intermittent, only in some places	Fair
					Low pedestrian movement	Very Poor
			3	link between urban form and commercial streets sidewalks	legible and accessible	Excellent	3
					Accessed Witth Some Barriers	Fair
					Complicated not easy to be access	Very Poor
	Continuity Enhancing		4	Blinths edges Enhance Walking and Staying	Continuous Edge, conforms to human scale	Excellent	3
					Connected, With some Barriers	Fair
					Segmented , not compatible with human scale or activated functions	Very Poor
			5	Obstucles in sidewalks	free from obstucles, Continous View	Excellent	3
					In some parts only	Fair
					Generator, old structres or street lighting features distributed along the pedesterian zone	Very Poor
			6	Aesthetically Pleasing Street	Functional and architectural diversity create a aesthetic approach	Excellent	3
					Diversity of architectural features and elements only	Fair
					It's not aesthetically pleasing	Very Poor
			7	Frontage Zone	Well Designed Connected With Mixed Activities	Excellent	3
					some parts are designed	Fair
					weak design nor connected	Very Poor
	Spatial Layout (Patterns)		1	Parking types and their proximity to the commercial street	different parking types (on edges, and close parking lots)	Excellent	3
					on edges only and designed within street	Fair
					on edges	Very Poor
			2	the delineate Street	pavement materials, guideposts, and raised pavement markers	Excellent	3
					pavement materials Differs	Fair
					only raised pavement markers	Very Poor
			3	Integration Inside & Outside Shops	Open to the outside and connected	Excellent
					Not completely separated nor connected	Fair	2
					No Connection	Very Poor
			4	Sidewalk Hierachy	A clear transition between street, walkway, and building	Excellent	3
					No furnishing zone separating street space and building or weak	Fair
					both pedesterian zone and furnishing zone are in a weak apperance	Very Poor
	Spatial Configuration		5	location of the Resting places in space	avilable in the furnishing zone	Excellent
					avilable in the pedesterian zone	Fair	2
					not avilable or very limited	Very Poor
			6	Built Environment & Human Behavior	Meets with Pedesterians movement and needs	Excellent	3
					Suitable in terms of activities variety, not suitable for movement	Fair
					Does not include activities variety and not suitable for Walking	Very Poor
			7	demarcation between public and private zones	Clear and visible with the avilability of street furniture	Excellent	3
					demarccation avilable but both are the same level	Fair
					not clear nor visible	Very Poor
			8	Landscape Area to Street Area	25%-30%	Excellent
					15%-5%	Fair
					5% or very limited	Very Poor	1
			9	Landscape Type	Mixed of Trees, Grass & Flowerpots	Excellent
					Only Trees	Fair	2
					No Greenery	Very Poor
	Spatial Temporal		10	Time Pedesterian Spend in Street	<=3 Hours	Excellent	3
					1-2 Hours	Fair
					>1 Hours	Very Poor
			11	Schematic approaches to reduce speed	Widding Sidewalks, with different levels and pavemnet.	Excellent
					Different Levels and pavements.	Fair	2
					no approaches to reduce speed	Very Poor
			12	extending activities at night time	extended to 12:00 AM	Excellent	3
					<12:00 AM	Fair
					Max till 10:00 PM	Very Poor
			13	Functions Diversity	more people due to function diversity, more time	Excellent	3
					more people but not diverse functions, less time	Fair
					less people less divers, less time expendind	Very Poor
	Climate protection		1	Shading on Sidewalks, & availability of canopies	avilable as a part of building and street design	Excellent
					very limited attached to buidling façade	Fair	2
					No shading devices	Very Poor
			2	Sunlight in Street (according to sun direction)	have a good access to its spaces, both sides	Excellent	3
					one is good	Fair
					both weak	Very Poor
	Greenary Convenience		3	Green Spaces	Part of Street Design	Excellent
					Parks on Sides of Street	Fair	2
					No Green Spaces	Very Poor
			4	Sidewalks and street vegetation	Avilable in Middle part and Sidewalks	Excellent
					in the middle only	Fair
					very limited greenary	Very Poor	1
	Attractiveness		1	Green avialbility in street and sidewalks	Avilable & well maintained	Excellent
					in (middle) parts mostly	Fair
					Not avilable or very limited	Very Poor	1
			2	Street Image	Creates a positive image, comfrotable, and attractive	Excellent	3
					Neutral Effects	Fair
					Creates a Negative image, not comfortable	Very Poor
	Locality and Identity		3	traditional and locality features	Avialble	Excellent	3
					Contemprory Features With Traditional	Fair
					No Traditional Features	Very Poor
			4	historical elements	avilabeln and clear	Excellent
					Mixed with contemprory elements	Fair
					No Historical Elements	Very Poor	1
			5	local activities	Avilable and diverse	Excellent	3
					Few only	Fair
					No local activities	Very Poor
			6	buiding styles and approcahes	Generates a meaning	Excellent
					in some limited buildings	Fair
					I do not bear the meaning and sense of perception	Very Poor	1
			7	The Street Known	Owns a distinctive architectural character	Excellent
					Various services and activities that people need	Fair
					have a distinctive landmarks or locality	Very Poor	1
	Place Attachment		8	Place and Person Relation	Friendly & Familier	Excellent	3
					Moderate Familierity	Fair
					weak Connection	Very Poor
			9	People in StreetScape	Familier To walk and sit	Excellent	3
					walking only, no sitting avilable	Fair
					Not Familier to sit or walk	Very Poor
			10	Street Environment	Reflects the People Needs	Excellent
					Some Needs Only	Fair	2
					Doesn’t Reflects all Peoples Needs	Very Poor
	Separation		1	Kerbs (edging stone or pavemnet raised path), bollards, Gurad Railling	avilable	Excellent	3
					avilable but difficult to realize	Fair
					not avilable	Very Poor
			2	Street and sidewalks isolated through	using levels, pavement materials, trees and furniture	Excellent	3
					levels only	Fair
					weak isolation	Very Poor
			3	parking spaces	Avilabile/ directly attached to sidewalks	Excellent
					Avilable, parking lots <1 km distance Separated, and attached parking	Fair	2
					not avilable	Very Poor
			4	Croosing Points	Avilable at specific distance as well clear and designed	Excellent
					Avilable but not maintained nor designed	Fair	2
					avilable but barely can view	Very Poor
	Speed		5	Car Speed	35-50 km/h	Excellent	3
					50-70 km/h	Fair
					<70 km/h	Very Poor
			6	Car Movement	is Restricted	Excellent
					In some Parts of the Street	Fair	2
					Not Controlled	Very Poor
	Physical Comfort		1	pedesterian fencing, Trees as Physical Separation	Rows of trees and Fencing line or other furniture, (benches or trash bin)	Excellent	3
					Trees only	Fair
					not avilable, or limited	Very Poor
			2	pedesterian trafic Light in street	avilable at the end edges of the street	Excellent	3
					avilable at the center of the street	Fair
					not avilable	Very Poor
			3	Sidewalks Pavement	accommodate walking and for different activities	Excellent
					accommodate walkiing, not maintained	Fair	2
					Doesn’t incourge walking	Very Poor
			4	Parking Integration	integrated, as a part of street design	Excellent
					Integrated, on sides only	Fair
					parking are not designed	Very Poor	1
			5	Frontage Area	Well Designed with spesific Area	Excellent	3
					Not Clear in some Parts moderate designed	Fair
					Very Poor Designed part	Very Poor
			6	Sidewalk and seating areas	part of sidewalk furniture and cafes and resturants	Excellent
					part of cafes and restaurants only	Fair	2
					not avilable	Very Poor
	Social Comfort		7	Sense of familiarity	With People And Functions	Excellent	3
					Moderate familiraity	Fair
					Not Familier	Very Poor
			8	Landuse and Function Varity, Density	Mixed Activites, for all people, Highe Density	Excellent
					Limited Activities,for all People, but Highe Density	Fair	2
					Few Activities with low Density	Very Poor
	Unified Sense of Place		1	Cultural events availability in street space or sidewalks	always avilable	Excellent	3
					some buildings or functions in street held a cultural events	Fair
					No events are available	Very Poor
			2	Street Atmosphere	attractive, accessible, and walkable	Excellent	3
					accessible, and walkable but not attractive	Fair
					Not Attractive and not easy to move through	Very Poor
			3	Clear Direction in street	Distinct landmarks, with divers activities	Excellent
					Landmarks Avilable, With limited activities	Fair	2
					no clear Landmarks	Very Poor
	Social Bonding		1	Local activities and Amenities availablity	Local Activities Avilable and Values	Excellent	3
					mixed vaules, local and contemprory	Fair
					No Specific Local Value	Very Poor
			2	Possibility to Sit and Eat	Available (Public & Private)	Excellent
					Available but as a part of Restaurants and Cafes	Fair	2
					Not Available	Very Poor
			3	Street Design accommodation for Movement	Accommodate Moderate Movement	Excellent	3
					Compatible with moderate movement, but weak connection between the two sides	Fair
					Compatible with fast movement and week connection with the sides	Very Poor
			4	Safe Mobility Between Sidewalks and Street	Definite Edges, Different Levels and differences of pavement materials, parking on edges.	Excellent	3
					Parking on edges but there are some cars on sidewalks as well.	Fair
					Weak mobility	Very Poor
			5	Architectural Language and Style	It includes a distinctive and unified language on most of street buildings	Excellent
					Some street buildings have a distinctive language	Fair
					It does not include any distinct language	Very Poor	1
	Sense of Belonging		1	Building Street Connection	Support Street as a Place	Excellent	3
					Realtion is Monotonous	Fair
					Create Negative Spaces, not connected to people	Very Poor
			2	People Connection With place Need.	Activities Meet All People needs	Excellent
					Some Activities (somehow meets people needs)	Fair
					Street activities doesnt meet all people's needs	Very Poor	3
			3	People Commitment towards the Street	Yes	Excellent
					Few People Only	Fair	2
					No	Very Poor

## Sheet: Eskan street
	No		Items		Eskan
	1	sociability abd activity	pedesterian density	high
				moderate
				low
	2		density in wich Activity, (No. of people gathering), in one hour	cafes and rest. And bakery,	30-50
				markets, supermarkets	3, 7
				mall	50-100
				clothes	4
				constructions, car isuues, mobile, etc, companies	2
				govermnetnatl	10,20
				houses	/
				pharmacy	2,5
				garage	10, 15
				hospitals	/							Number of activities	activities percentage
				empty site	/
	3		number of buildings types	cafes and rest. And bakery,	34		34				cafes and rest. And bakery,	34	0.4
				markets, supermarkets, and other shops	10		51				markets, supermarkets, and other shops	10	0.117647
				mall	1						mall	1	0.0117647
				clothes, tailor	8						clothes, tailor	8	0.0941176
				different shops, companies,constructions, car isuues, mobile, etc	24						companies, constructions, car issues mobile	24	0.282353
				govermnetnatl	1						governmental	1	0.0117647
				houses, hotels	1						houses, hotels	1	0.0117647
				pharmacy, and doctors, and plastic	2						pharmacy, and doctors, and plastic	2	0.0235294
				garage	2						garage	2	0.0235294
				hospitals	0						empty site	2	0.0235294
				empty site	2						sum	85	1
				Masjid and church	0
				schools	0								Cafes and Restaurants		34	85	0.4
				others									others, ( markets, clothes, tailors, mall, mobile devices, car accessory, etc.)		51		0.6
	4		activities other than commercial		bank
	5		landuse and function varity and desnity	mixed activities for all people, high density
				limited activities, all people but high density
				few activites with low density
	6		activities constration in street	all the street
				midlle part only
				ends of the street
			functions suitability for ages	for all ages
				only men
	7			mostly men women no children
			amenities avilability	avilable
				not avilable
	8			in gardens only
	9		local retails	avilable along street
				moderate
				no local retails
	10		types of local activities	food
				clothes
				shops
				others
	11		gathering avilability	in public parts
				in private parts
				not avilable
	12		Time Activation street	mostly morning and afternoon
				morning and night
				morning and extend at night
	13		time expend	less than 1 hour
				1-2 hours
				more than 2 hours
	14		activities types enhance extending at night		cafes and resturants
	15		shopes types	only formal
				only informal
				mixed
	16		number of people in 1 m2
	17		Reaching the street	clear and easy direction and accessibility
				not clear nor accessible
	18		urban context and street place	clearly connected
				weak connection
	19		street atmosphere is esthitically pleasing	yes	people like to sit and eat
				no	not clean, specified activities, specified genders
	20	physical setting	street length m		671
	21		street width m		20
	22		street lanes		1
			من الامانه عدد لاين		4
	23		Segments number	side A	7
				side B	11
	24		Segments distance	side A	50% 45-50
				side B	90% 45-50
اخلي سوال بالاستبيان	25		middle part avilable	yes
	26			no
	27		middle part width		/
	28		transiton places avilable and (No.)		2
	29		distance between them		100m, 184m, 365m
	30		transition between two sides	easy to transite	limited width, and limited speed
				moderate easiness
				difficult ?(why)
	31		Trafic light, (and pedesterian transiton )	avilable	2
				not avilable
	32		parking avilability	yes
				no
	33		parking types	parking lots
				street side parking
	34		parking distance		300-500 m
	35		moving from parking to buildings and its integration	clear direct and close, and integrated
				clear integrated but far
				not clear distnation nor close, no integration
				no parking
	36		street design accomadtes movements	yes
				smeohow
				no
	37		cyclists and special need people design avilability features	avilable
				not avilable
	38		sidewalk widths		3.5, 4.5, 6, 6.5,10
	39		sidewalk widths accomadates	4 persons
				more than 5
				less than 2
	40		activities in sidewalk encourge walking	yes
				just buy and leave
				no
	41		pedesterian movemnet are	constant and clear
				inconstant
	42		sidewalk connection	continous
				segmented
	43		sidewalks parts	all three parts are clear
				some parts merged
				width is vey limited to identify the parts or (no sidewalk)
	44		sidewalk Hierarchy are very clear	yes
				no
	45		street and sidewalk relation	clear	good width
				not clear
	46		level avilability between sidewalks and streets	yes
				no
	47		sepration between sidewalk and street by; (sidewalks fencing)	different levels and materials
				carbs and short columns or furnitures
				no sepration
	48		clear demarcation between public and private	yes
				no
	49		obstucles in sidewalk	free from obstucle (limited)	in the daytime
				some obstucles have been approached
				many have been seen
	50		obstucles Types	generators
				parts of old structure
				street furniture
				columns
				others, (steps, shops elemnts, higher levels, …etc)
	51		sidelwalk contains seating areas	part of sidewalk furniture
				part of cafes and restaurants
				not avilable
	52		Pavement materilas types	cemnet tyles
				rocks
				ceramic tiles
				others
	53		pavement materilas accomadates walking	yes
				somehow
				no
	54		proportion (widht:height)	1;1 (W,H)
				2;1 (W,H)
				1;2 (W,H)
	55		Building Height	mostly (1-2) floors
				2,9
				4,10
	56		building height on both sides	Compatible
				moderate differences
				huge differences
	57		Building direction mostly;	parralel to street
				digonal
				perpendicular
	58		street connection with building	directly
				indirectly, (by the sidewalk)
	59		building connection with sidewalks	direct connection
				steps
				space
	60		furniture avialability	part of street
				part of cafes and rest.
				both
				no furniture
	61		Furniture, Type	benches
				trash bens
				lighting features
				bus stop
				signage
	62		location of sitting area	furnishing zone
				pedesterian zone
				frontage zone
				no sitting area
	63		furniture condition	maintained
				not mainained
				not avilable
	64		street light	avilable
				not avilable
	65		distances between them		8 m
	66		lighting height		6 m
	67		shop light	avilable
				not avilable
	68		façade tranceperancy	good connection
				weak connection
				no connection
	69		inside and outside shops relation	higly connected
				moderate connection
				weak connection
	70		façade type		mostly cement and bricks, cobon metal and glass
	71		façade elemnts	local
				modern
				historical
				mixed
				not specific
	72		street gives a locality approach	yes	materials,height,type of food
				somehow
				no
	73		building Elevation	connected and continous almost same height
				segmented
				connected but not same height
	74		Blinths edges design enhance walking	yes	protected by canopies, wide sidewalks
				somehow
				no
	75		frontage zone design	well designed continous enhance walking
				some parts are designed
				weak design
	76		active frontage zone	yes? Why	sitting area, width good, many cafes to sit
				somehow
				no? why
	77		entrances No. in each (100)		(2,7 ) in side the other (10, 15)
	78		building relation	continous
				segmented
				partialy segemnted
	79		building unity	close height
				same Arch. Styles
				close materials, colors, and height
				no unity
	80		Elevation and Architectural styles in buildings	most building have arch. Styles
				some ditinctive activities have a style
				very limited arch. Style, (or no specific style)
	81		buildings reflects their functions	yes
				somehow
				no
	82		shops with a specific theme	mostly have
				some
				no specific themes are detected	no if avilable
	83		building and shops have view to street	mostly towrds out
				some building closed to inside
				mostly have limited relation to outside
	84		building masses	continous masses mostly
				some parts are fragmanted
				very fragmented (doesn’t form continous masses)
	85		building connected togather to form a cnyon	yes
				parts of the street only
				no, its segmented masses
	86	environmental	trees number		40								green percentage
	87		green percentage		if we count the garden (54%), if not it will be less than (2%)								without the garden	0.02
	88		green type	trees only									with the garden	0.54
				trees and green
				trees, green, and flower beds
	89		trees height	less than 3 m
				from 3, 5 m
				more than 5 m								All	Number of Activity (126)	percetage
	90		movable vendors, shading devices, etc	avilable								House	1	0.00793651
				limited								Restaurants and cafes	41	0.325397
				not avilable								Empty Sites	2	0.015873
	91		green spaces part of street and sidewalk design	yes
				no
	92		green locations in street and sidewalks	sides and middle part								side A	Number of Activity (37)	Percentage			Side B	Number of Activity (89)	Percentage
				middle part with very limited in sides								House	0	0			House	1	0.0112
				sides only								Restaurants and cafes	15	0.405405			Restaurants and cafes	26	0.2921
	93		green Maintenance	very well maintenaned								Empty Sites	1	0.027027			Empty Sites	1	0.0112
				maintenaned
				poor maintence
	94		shading devices types	trees, canopies, and slabs
				canopies only
				non (very limited)
	95		sunlight reaches most of shops façade	yes
				no
	96	imageability, comfort safe, s.o.p	ways used in street to reduce speed	changing Materials
				narrowing street
				not avilable
	97		car speed	35-50
				50-70
				<70
	98		car movemnet and controlling	overall restricted
				in some parts not controlled
				no controll
	99		possible to sit anywhere	yes
				some parts
				no
			street has friendly approach	yes, (why)	good sidewalk width, limited street width, height of buildings
				no, (why)
			streetscape easy to walk in	yes, (why)	good sidewalk width, limited street width, height of buildings
				no, (why)
			street meet all people needs	yes
				no
			the overall street atractive and accessible	attractive only
				accessible only
				both
			cultural events	avilable? (what)
				not avilable
			landmarks or some distinct buildings in street	avilable? (what)	Rehin Mall
				not avilable
			locality approach in the street environment	yes? (what)	buying on ground, informal shops, clothes, food
				no
			people have a commitment to street حس بالمسؤولية	yes
				somehow
				no
	Night Data
		NightData	people concentrating/ where/ No. of people on each activity	bakery	5,8
				cafes	20,30
				restaurants	35
				icecream and drinks	3,5
				markets	2,5
				cloth shops	2,5
				Mall	/
				gardens in street	25
				cosmitics	/
				others	/
			most concetrating are in;	middle of the street/ ends not working
				its ends
				most of it
			type of activities most used in night		cafes, restaurants, juic makers on booths
			pedesterian movemnet	very good
				moderate
				weak
			which is more car movemnet or pedesteraina	Cars
				pedesterain
				both equal
			cars speed at night		20-30
			transmitting between the two sides	easy
				moderate
				hard
			lighting avilability	street light
				shops and building
				both
			which lighting are more obvious	shops and building
				street light
				both
			location of the lighting columns	sides of the street
				middle only
			shops lighting effectiveiness over street lighting	high
				moderate
				low
			types of lighting used in shops and buildings	led
				columns (short and tall)
				bulps
				lighting boards
			dark parts in street	yes/ where
				not avilable	very limited
			transperency percentage in shops façade	no. and precentage, (aproxmit no.)	the goods controlled on the façades on the sidewalks, (we can not see the transperency).
				exact number	0.66
			types of these façade	its types
			shops types	most formal
				most Informal
				mixed
			local activities avilability	yes
				no
				very limited
			types of it		حلاق, عصاير, جكاير, بيع ادوات انشائية, خبز, معجنات و لحم بعجين اضافة الى المطاعم التي تقدم اكل محلي و شرب محلي
